# Supplementary material for: Effectiveness of fecal-derived microbiota transfer using orally administered capsules for recurrent Clostridium difficile infection
Source: Springer Nature journal article supplement (doi:10.1186/s12879-015-0930-z), 2015-04-16
Supplement: MOESM1 [file 9739860]

| Subject | CDI risk factors                                                                                                    | Previous relapses | Previous CDI treatment                                    | Previous hospital stays for CDI | Previous immunosuppressive use | Previous PPI use | Previous history of FMT | Instance of treatment | Number of capsules | Dose (g input material) | Adverse effects observed          | Time to symptom relief | Lasting cure |
|---------|---------------------------------------------------------------------------------------------------------------------|-------------------|-----------------------------------------------------------|---------------------------------|--------------------------------|------------------|-------------------------|-----------------------|--------------------|-------------------------|-----------------------------------|------------------------|--------------|
| A       | Ciprofloxacin for urinary tract infection; irritable bowel syndrome                                                 | 3                 | vancomycin, fidaxomicin                                   | No                              | No                             | No               | No                      | Single treatment      | 9                  | 1.1                     | Mild abdominal pain               | 2 days                 | Yes          |
| B       | Antibiotics for pyelonephritis/urosepsis                                                                            | 4                 | vancomycin, metronidazole                                 | No                              | No                             | No               | Yes                     | Single treatment      | 15                 | 3.6                     | None                              | 3 days                 | Yes          |
| C       | Antibiotics for frequent respiratory infections                                                                     | 4                 | vancomycin                                                | 1                               | No                             | No               | No                      | Single treatment      | 12                 | 3.6                     | None                              | 4 days                 | Yes          |
| D       | Antibiotics; mucositis                                                                                              | See legend*       | vancomycin, IV tigecycline, IV metronidazole, fidaxomicin | 1                               | Chemotherapy                   | No               | No                      | Single treatment      | 8                  | 3.0                     | None                              | 4 days                 | Yes          |
| E       | Antibiotics for diverticulitis                                                                                      | 5                 | vancomycin, metronidazole, fidaxomicin                    | No                              | No                             | Yes              | No                      | Single treatment      | 15                 | 3.6                     | None                              | Gradual (see legend**) | Yes          |
| F       | Clindamycin for Group B streptococcus                                                                               | 4                 | metronidazole, vancomycin                                 | 1                               | No                             | No               | No                      | Single treatment      | 12                 | 3.6                     | None                              | Gradual                | Yes          |
| G       | Antibiotics for respiratory tract infection                                                                         | 7                 | vancomycin, fidaxomicin                                   | 5                               | No                             | No               | No                      | Single treatment      | 15                 | 3.6                     | Moderate-to-severe abdominal pain | Gradual                | Yes          |
| H       | Levofloxacin (multiple courses); previous norovirus enteritis; irritable bowel; ulcerative colitis; previous Asacol | 4                 | vancomycin, metronidazole, fidaxomicin                    | No                              | No                             | No               | No                      | Single treatment      | 8                  | 3.6                     | None                              | Gradual                | Yes          |
| I       | Antibiotics; prolonged healthcare facility stay                                                                     | 3                 | vancomycin (multiple courses), prolonged IV metronidazole | 2                               | No                             | No               | No                      | Single treatment      | 8                  | 3.0                     | Mild abdominal pain               | Gradual                | Yes          |
| J       | Antibiotics; frequent hospitalization; chronic diarrhea; dehydration                                                | 3                 | vancomycin                                                | No                              | No                             | Yes              | Yes                     | Single treatment      | 10                 | 1.1                     | None                              | Gradual                | Yes          |
| K       | Antibiotics                                                                                                         | 2                 | vancomycin, metronidazole                                 | No                              | No                             | No               | No                      | Single treatment      | 6                  | 1.1                     | None                              | Gradual                | Yes          |
| L       | Antibiotics including ciprofloxacin for foot infection                                                              | 3                 | vancomycin                                                | 3                               | No                             | Yes              | No                      | Single treatment      | 8                  | 1.1                     | None                              | Gradual                | Yes          |
| M       | Antibiotics; prolonged healthcare facility stay                                                                     | 2                 | vancomycin                                                | No                              | Methotrexate                   | Yes              | No                      | Single treatment      | 10                 | 8.3                     | None                              | Gradual                | Yes          |
| N       | Ceftriaxone/azithromycin for respiratory infection                                                                  | 4                 | metronidazole, vancomycin                                 | No                              | No                             | No               | No                      | Single treatment      | 12                 | 8.3                     | None                              | Gradual                | Yes          |
| O       | Clindamycin for cellulitis                                                                                          | 3                 | metronidazole, vancomycin, fidaxomicin                    | No                              | No                             | No               | No                      | Single treatment      | 8                  | 3.0                     | None                              | 3 days                 | No           |
| P       | Intensive antibiotics for polymicrobial bacteremia                                                                  | 6                 | vancomycin, fidaxomicin                                   | No                              | No                             | No               | No                      | First                 | 9                  | 3.6                     | None                              | Gradual                | No           |
|         |                                                                                                                     |                   |                                                           |                                 |                                |                  |                         | Second                | 10                 | 8.3                     | None                              | Gradual                | Yes          |
| Q       | Antibiotics; intestinal lymphoma                                                                                    | 3                 | vancomycin, metronidazole, fidaxomicin                    | No                              | Chemotherapy                   | No               | No                      | First                 | 10                 | 1.1                     | None                              | Gradual                | No           |
|         |                                                                                                                     |                   |                                                           |                                 |                                |                  |                         | Second                | 12                 | 1.1                     | None                              | Gradual                | Yes          |
| R       | Antibiotics                                                                                                         | 3                 | vancomycin, metronidazole, fidaxomicin                    | No                              | No                             | No               | No                      | First                 | 12                 | 1.1                     | Mild abdominal pain               | Gradual                | No           |
|         |                                                                                                                     |                   |                                                           |                                 |                                |                  |                         | Second                | 10                 | 1.1                     | None                              | Gradual                | Yes          |
| S       | Antibiotics                                                                                                         | >3                | vancomycin, metronidazole, fidaxomicin, rifaximin         | 3                               | Chemotherapy                   | No               | No                      | First                 | 6                  | 1.1                     | Mild abdominal pain               | 3 days                 | No           |
|         |                                                                                                                     |                   |                                                           |                                 |                                |                  |                         | Second                | 8                  | 1.1                     | Mild abdominal pain               | None                   | No           |
|         |                                                                                                                     |                   |                                                           |                                 |                                |                  |                         | Third                 | 10                 | 1.1                     | None                              | None                   | No           |
|         |                                                                                                                     |                   |                                                           |                                 |                                |                  |                         | Fourth                | 22                 | 3.6                     | Mild abdominal pain               | None                   | No           |

**Table 2. CDI history, risk factors, treatments and outcomes for patients receiving FMT.**

\*This patient had continuous CDI diarrhea for one year despite antimicrobial treatment.

\*\*Initial improvement in symptoms was observed within 3 days; symptom improvement continued over the course of 2 weeks.
